# Supplementary material for: Remote group intervention for adults with cancer-related cognitive impairment: A feasibility study.
Source: Research Square preprint supplement (doi:10.21203/rs.3.rs-5541748/v1), 2024-12-24
Supplement: Supplementary file 1 [file 1e0f57cb39d8dde395dd576c.pdf]

## Supplementary Materials

Remote group intervention for adults with cancer-related cognitive impairment: A feasibility study.  
Supportive Care in Cancer

Authors' names: Chenanit Hamami, Tamar Peretz, Mor Nahum, Talia Maeir, Ofra Maimon and Yafit Gilboa.

[Chenanit.hamami@mail.huji.ac.il](mailto:Chenanit.hamami@mail.huji.ac.il)

1 School of Occupational Therapy, Faculty of Medicine, Hebrew University of Jerusalem, 91240 Jerusalem, Israel.

2 Department of Physical Medicine and Rehabilitation, Hadassah Medical Center, POB 24035, Jerusalem 91240, Israel.

**Table 1.**

Summary description of the Adaptive Cognitive Evaluation (ACE) subtests

| Task                    | Description                                                                                                                                                                                                                                                                                                                                                                                                                                | Cognitive Domain                                | Outcome variable           |
|-------------------------|--------------------------------------------------------------------------------------------------------------------------------------------------------------------------------------------------------------------------------------------------------------------------------------------------------------------------------------------------------------------------------------------------------------------------------------------|-------------------------------------------------|----------------------------|
| Triangle Trace (TNT)    | This includes two separated tasks, first performed independently and then concurrently. In the Tap task, participants are instructed to attend to a frame of colored shapes and tap with the other when the green triangles (target) appear and ignore all other colored shapes (distracting). In the Trace task, participants are instructed to trace a line with one hand and tap with the other when the green triangle border appears. | Dual task                                       | Mean reaction time (RT)    |
| Stroop/ Color Tricker   | Participants view colored words that spell a color and are instructed to identify the color of the word (target) and ignore the word spelled (distractor).                                                                                                                                                                                                                                                                                 | Response inhibition                             | Overall Rate Correct Score |
| Task Switch/ Sun & Moon | Participants view a cue (i.e., Color or Shape) followed by a stimulus (i.e., a 'orange-colored' or 'green-colored' sun, or moon), and are instructed to identify the feature type cued. For instance, if a participant is cued Color, and is shown a green sun, participants indicate green by pressing the green button on the screen.                                                                                                    | Task switching                                  | Overall Rate Correct Score |
| Flanker                 | Participants view an array of five arrows and are instructed to identify the central arrow (target) and ignore the flanking arrows (distractors). The four flanking arrows are always the same as each other. The central arrow can match them or face the opposite direction.                                                                                                                                                             | Selective attention and interference resolution | Overall Rate Correct Score |

The information was retrieved from <https://neuroscape.ucsf.edu/researchers-ace/>

**Figure 1.** *The study procedure.*

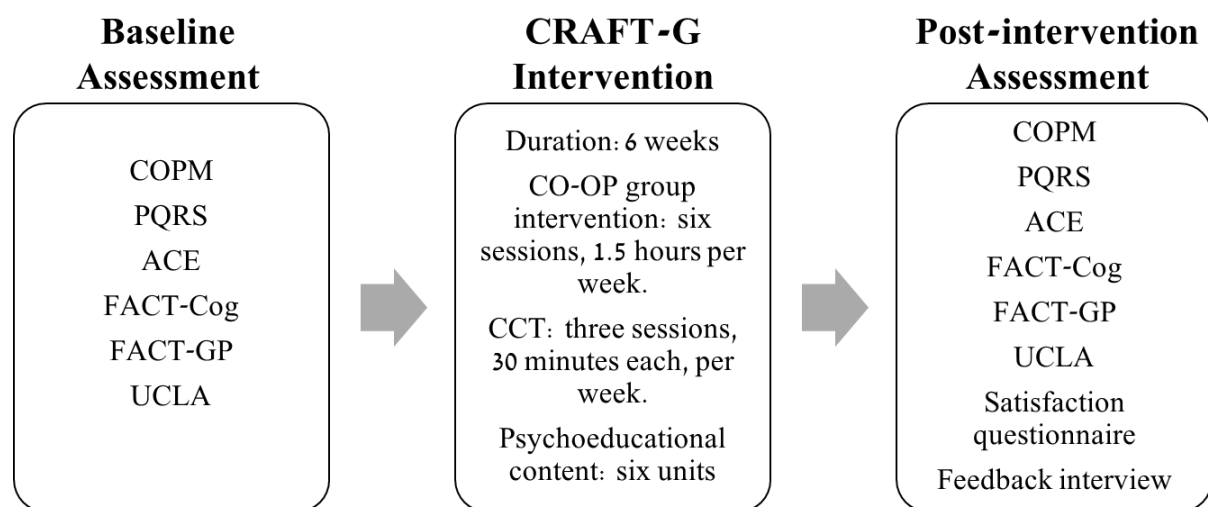

*Notes.* COPM: Canadian Occupational Performance Measure; PQRS: The Performance Quality Rating Scale; ACE: Adaptive Cognitive Evaluation; FACT-Cog: Functional Assessment of Cancer Therapy–Cognition; FACT-GP: Functional Assessment of Cancer Therapy–General Practice; UCLA: The revised UCLA Loneliness Scale; CRAFT-G: Computerized Retraining and Functional Treatment Group.

**Table 2.**

CRAFT-G protocol: Psychoeducational content, group stages, and CO-OP goals according to the sessions

| Session | Psychoeducational Content                                                                                                                                          | Stage of group formation                                                                                                                                                                          | CO-OP goal pursuit                                                            |
|---------|--------------------------------------------------------------------------------------------------------------------------------------------------------------------|---------------------------------------------------------------------------------------------------------------------------------------------------------------------------------------------------|-------------------------------------------------------------------------------|
| 1       | CRCI: prevalence, causes, diagnosis, consequences<br><br>Introduction to the principles of CRAFT-G intervention                                                    | Forming:<br><ul style="list-style-type: none"> <li>• Meeting other group members</li> <li>• Defining group purpose and rules</li> <li>• Identifying individual strength and weaknesses</li> </ul> | Learning about Goal-Plan-Do-Check                                             |
| 2       | Cognitive functions, executive functions                                                                                                                           | Storming:<br><ul style="list-style-type: none"> <li>• Competition among group members</li> </ul>                                                                                                  | Guided discovery of individual DPA-specific strategies                        |
| 3       | Neuroplasticity and CCT:<br>Refine the principles of treatment and its effect on improving cognitive function                                                      | <ul style="list-style-type: none"> <li>• Engaging in conflict from desire to succeed and avoid failure in front of new friends or strangers</li> </ul>                                            |                                                                               |
| 4       | Side-effects after treatment, and their connection to cognitive decline                                                                                            | Norming:<br>Developing cohesion with greater sharing, turn-taking, and emergent collaborations on problem- solving                                                                                | Individual goals shifting toward group support<br>Teamwork and group goals    |
| 5       | Mental conditions (depression, stress, anxiety) and psychosocial aspects (self-stigma and loneliness) after recovering from cancer, and how it is relevant to CRCI |                                                                                                                                                                                                   |                                                                               |
| 6       | Review and summary of psychoeducational content                                                                                                                    | Performing:<br><ul style="list-style-type: none"> <li>• Engaging in collaborative projects</li> <li>• Confidently defining plans and testing themes in public</li> </ul>                          | Generalization and transfer of strategies to preserve successes in daily life |

*Note.* The four stages of group formation are adapted from Tuckman (1965). CO-OP = Cognitive Orientation to Occupational Performance. DPA = dynamic performance analysis.

**Table 3.**

Themes, sub-themes and quotes emerging from participants' feedback interviews.

| Theme | <b>Group dynamic and therapeutic relationship</b> |                                                                                                                                                                                                                                                                                                                                                                                                                                                                                                                                                                                                                                                                                                                                                                                                                                                                                                                                                                                                                   |
|-------|---------------------------------------------------|-------------------------------------------------------------------------------------------------------------------------------------------------------------------------------------------------------------------------------------------------------------------------------------------------------------------------------------------------------------------------------------------------------------------------------------------------------------------------------------------------------------------------------------------------------------------------------------------------------------------------------------------------------------------------------------------------------------------------------------------------------------------------------------------------------------------------------------------------------------------------------------------------------------------------------------------------------------------------------------------------------------------|
|       | Sub-themes                                        | Sample Quotes                                                                                                                                                                                                                                                                                                                                                                                                                                                                                                                                                                                                                                                                                                                                                                                                                                                                                                                                                                                                     |
|       | About the therapeutic relationship                | Participant 1: "I think that she [the facilitator] contributed a lot, she has a lot of compassion and is very practical, and she both empathizes and shares how she does or does not succeed in her goals, so there was a pleasant atmosphere in the group."<br>Participant 5: "We're a bit like children sometimes; there are symptoms, there are side-effects... Maybe it is necessary to put the finger more on the pulse. That is, to pay attention that everyone is connected."                                                                                                                                                                                                                                                                                                                                                                                                                                                                                                                              |
|       | About the group's composition                     | Participant 4: "There was one person there that I really can't stand. She's not a bad person, but I just can't stand her. In any case, it kind of... made the group dynamic difficult for me."<br>Participant 3: "I think that maybe for the young girl who was there, it would have been good to have older women who would have greatly encouraged her, not me. As for me, I don't think there's an advantage to having someone young there."                                                                                                                                                                                                                                                                                                                                                                                                                                                                                                                                                                   |
|       | About the group's atmosphere                      | Participant 1: "Participant 3 said that the group was a bit depressing, because she heard from someone relatively young talking about how having cancer has affected her life. I'm glad that I can empower Participant 2; I'm not depressed hearing about the difficult things she has been through. I do feel a sense of compassion towards her. It's a bit unfortunate that people who started then left immediately, but it's part of the dynamics of a group and something new, so it was a bit disappointing. The downside is that people start and then don't continue, and they're not committed to it, which is upsetting. On the other hand, there's intimacy in a small group."<br>Participant 5: "I saw that I have something to give and something to take from the group... It's a reciprocal relationship, meaning both taking and giving... Even when I was in a conversation, I had something to contribute as well... I felt that there is something to gain in the research, and it helped me." |
|       | Relating to similar feelings and experiences      | Participant 2: "I think that the ability of the group is to support each other, to uplift one another. Doing it alone won't always yield the same results."<br>Participant 5: "When I say 'the power of a group,' it means that when you hear someone talking about their difficulties, you already experience some kind of identification. It means you already think 'okay, I'm not alone in this story; there, she's going through what I'm going through.' ...I'm not imagining, I'm not going through something here where no one can understand me. So, in itself, this is a very powerful thing."                                                                                                                                                                                                                                                                                                                                                                                                          |
| Theme | <b>Intervention components</b>                    |                                                                                                                                                                                                                                                                                                                                                                                                                                                                                                                                                                                                                                                                                                                                                                                                                                                                                                                                                                                                                   |
|       | Sub-themes                                        | Sample Quotes                                                                                                                                                                                                                                                                                                                                                                                                                                                                                                                                                                                                                                                                                                                                                                                                                                                                                                                                                                                                     |
|       | CCT                                               | Participant 2: "I love games, so for me, it was a competitive thing. It was always about trying to do better than what I did the first time, so I really enjoyed it."<br>Participant 1: "I did feel there is something about it to do with neuroplasticity. Like something awakened that was dormant."                                                                                                                                                                                                                                                                                                                                                                                                                                                                                                                                                                                                                                                                                                            |
|       | CO-OP component                                   | Participant 2: "I also learned through the program how to execute the plan [from GPDC strategy] – setting a goal, checking the goal – I think yes, I took a lot of things from there - I use them in my daily life as tools."                                                                                                                                                                                                                                                                                                                                                                                                                                                                                                                                                                                                                                                                                                                                                                                     |

|       |                                                         |                                                                                                                                                                                                                                                                                                                                                                                                                                                                                                                                                                                                                                                                                                                                                                                                                                                                                                                                                                                                                                                                                                                                         |
|-------|---------------------------------------------------------|-----------------------------------------------------------------------------------------------------------------------------------------------------------------------------------------------------------------------------------------------------------------------------------------------------------------------------------------------------------------------------------------------------------------------------------------------------------------------------------------------------------------------------------------------------------------------------------------------------------------------------------------------------------------------------------------------------------------------------------------------------------------------------------------------------------------------------------------------------------------------------------------------------------------------------------------------------------------------------------------------------------------------------------------------------------------------------------------------------------------------------------------|
|       |                                                         | <p>Participant 3: <i>"I think it was very good. We learned something, we were sent to implement it either during the activity or throughout the week. There was an invitation to participate in it, to follow it, meaning to take it very, very seriously. Yes, so I think it was very focused on the implementation and success of new things."</i></p> <p>Participant 4: <i>"I found it important that the therapist emphasizes the goal; that it needs to be quantified, as if it can be measured. And I remained with a feeling like... how do you implement this, yes...? How do you implement this idea, and especially how do you implement the check [from GPDC strategy] phase?"</i></p> <p>Participant 1: <i>"[The content] gave a 'gushpanka' [seal of approval] to the theory, showing that you really didn't make it up – and I'm not alone in that matter."</i></p> <p>Participant 2: <i>"The presentation wasn't long, and we could have finished it – but because we lingered a lot on ourselves, and also on how we're implementing the strategy, when we got to the presentation, we kind of had to rush it."</i></p> |
| Theme | <b>Client factors</b>                                   |                                                                                                                                                                                                                                                                                                                                                                                                                                                                                                                                                                                                                                                                                                                                                                                                                                                                                                                                                                                                                                                                                                                                         |
|       | Sub-themes                                              | Sample Quotes                                                                                                                                                                                                                                                                                                                                                                                                                                                                                                                                                                                                                                                                                                                                                                                                                                                                                                                                                                                                                                                                                                                           |
|       | Motivation for intervention                             | <p>Participant 1: <i>"I didn't make it up; there are studies, it's a thing, it's a real field, people are working on it. So, all of this is a kind of drive and hope and motivation to grasp yourself and change."</i></p> <p>Participant 4: <i>"I managed to maintain a day-on, day-off schedule for cognitive training, which I didn't achieve this week, by the way. The group ended, and my motivation to play the game significantly decreased."</i></p> <p>Participant 5: <i>"I have a lot of side-effects, and one of them is terrible fatigue. And sometimes it's like I have no energy... I have no energy now to play the game [CCT]; I have no energy now to connect to Zoom."</i></p> <p>Participant 1: <i>"There are basic elements of playing computer games, and I had zero knowledge. Now, Participant 2 gets it; maybe she spent hours playing computer games when she was sick, so she did empower me, as it was fun for her."</i></p>                                                                                                                                                                                |
|       | Subjective perception on cognitive functional abilities | <p>Participant 3: <i>"Once I was like this, when preparing to leave the house – making lists in my head of what I need to accomplish... 'Don't forget these papers, put on makeup, do this, deodorant.' And then in the group, I said to myself, 'What nonsense; don't I know that I need to put on deodorant?' ...It's true that sometimes I still need to remember to take certain papers or something like that, but there's something in me that calmed down, and it's not as if automatically doing this checklist and going around with it is something that takes care of me. There are some habits that have been established, and I can rely on myself more."</i></p> <p>Participant 4: <i>"Truly I have more appreciation for my coping with the cognitive impairment. I am prouder of myself. I also notice that I pay more attention to the strategies I adopted even before the group... not letting things slip my mind... I am prouder of myself, which releases me from a lot of guilt."</i></p>                                                                                                                        |

**Table 4.**

Participants' selected goals, importance ratings, and classification according to the ICF.

|    |           | Goals                                                         | IR  | Life domain- ICF                  |
|----|-----------|---------------------------------------------------------------|-----|-----------------------------------|
| P1 | Trained   | Plan and manage daily schedule                                | 10* | d2301: Managing daily routine     |
|    | Untrained | Arrange and plan timetable for writing a book                 | 10  | d2101: Undertaking a complex task |
|    | Untrained | Increase working hours' range                                 | 10* | b1400: Sustaining attention       |
| P2 | Trained   | Manage and remember daily schedule                            | 7*  | b1642: Time management            |
|    | Untrained | Recall location of essential items                            | 10* | b144: Memory functions            |
|    | Untrained | Concentrate on one task until completed                       | 9*  | d210: Undertaking a single task   |
| P3 | Trained   | Recall details from a reading book for short-term period      | 8   | b1442: Retrieval of memory        |
|    | Untrained | Retrieve details of patients                                  | 8*  | b1442: Retrieval of memory        |
|    | Untrained | Maintain key points of a study article for a long-term period | 8*  | b144: Memory functions            |
| P4 | Trained   | Retrieve daily tasks when required                            | 10* | b1442: Retrieval of memory        |
|    | Untrained | Be wakeful among people                                       | 8*  | b110: Consciousness functions     |
|    | Untrained | Retrieve details of acquaintances                             | 7   | b1442: Retrieval of memory        |
| P5 | Trained   | Read 15 pages from a book in a day                            | 7   | b1400: Sustaining attention       |
|    | Untrained | Concentrate on one task until completed                       | 8*  | d210: Undertaking a single task   |
|    | Untrained | Retrieve details from previous conversations                  | 8*  | b1442: Retrieval of memory        |

*Notes.* P = Participant; IR = importance rating, rated by participants on a 10-point scale (1: "not at all important," 10: "very important") on the COPM; ICF, the International Classification of Functioning, Disability and Health (WHO, 2001) (<http://apps.who.int/classifications/icfbrowser/>).

\*Indicates goal improved to criterion ( $\geq 2$  points; Carswell et al., 2004) at post intervention based on participants' COPM performance and/or satisfaction ratings.
